# Supplementary material
Source: publisher figshare collection journal article supplement (https://future-science-group.figshare.com/ndownloader/files/28340370)
Supplement: Supplementary file 1 [file 28340370]

| **Supplemental Table 1. Multidose Methadone-based Multimodal Analgesia Protocol for**  **Posterior Spine Fusion and Pectus Excavatum Repair in Adolescents** | | |
| --- | --- | --- |
|  | **Scheduled** | **PRN** |
| **PreOp**  **IntraOp** | PO acetaminophen (15 mg/kg) 1 dose  PO celecoxib 1 dose  (<45kg: 100 mg; >45kg: 200 mg)  PO Naloxegol 1 dose  (50kg: 12.5 mg; >50 mg: 25 mg)  IV Methadone (0.1 mg/kg, max 5 mg ) 1 dose  IV Ketorolac (0.5 mg/kg up to 30 mg) 1 dose |  |
| **POD0** | IV Methocarbamol (10mg/kg) Q8H X 6 doses  IV ketorolac (0.5 mg/kg) Q6H X 4 doses  IV Ondansetron (0.1 mg/kg) Q8H x 5 doses  PO methadone Q12H X 1 dose - evening  PO Acetaminophen Q6H | IV morphine (0.05 mg/kg) or hydromorphone (0.01 mg/kg) Q3H PRN  PO Diazepam (2-3 mg) Q6H PRN  IV Nalbuphine Q6H PRN  Scopolamine patch 72H PRN |
| **POD1** | PO Oxycodone (0.1 mg/kg, max 5 mg) Q6H  PO Naloxegol Q24H  PO methadone Q12H X 2 doses | IV morphine / hydromorphone Q3H PRN  PO Diazepam Q6H PRN  IV Nalbuphine Q6H PRN |
| **POD2** | PO ibuprofen (10 mg/kg) Q6H  PO methadone Q12H X 1 dose  PO methocarbamol Q8H  PO Oxycodone (0.1 mg/kg) Q6H  PO Naloxegol Q24H | PO Ondansetron Q6H PRN  PO Diazepam Q6H PRN |
| **PRN: Pro Re Nata (as needed)**  **PO: Per Oral**  **IV: Intravenous**  **SC: subcutaneous**  **PreOp: Preoperatively**  **IntraOp: Intraoperatively**  **POD: Post-operative day** | | |
| Pectus excavatum patients receive a thoracic epidural analgesia intraoperatively and postoperatively with an infusion of 0.2% ropivacaine, that is continued until POD2, in addition to the above multimodal analgesic protocol | | |
